# Supplementary material for: Pregnancy exposure registries for drugs and vaccines in low-income and middle-income countries: scoping review protocol
Source: HighWire-hosted journal article supplement (doi:10.1136/bmjopen-2022-070543), 2023-05-01
Supplement: bmjopen-2022-070543supp002_data_supplement.pdf [file bmjopen-2022-070543supp002_data_supplement.pdf]

## Data Extraction Form

### PART 1: STUDY IDENTIFICATION / INCLUSION STATUS

Resource title:

Author(s):

Year of publication:

Resource type:

1. ☐ 1 - Peer reviewed journal
2. ☐ 2 - Grey literature
3. ☐ 3 - Registry
4. ☐ 4 - Website
5. ☐ 5 - Key informant survey / interview
6. ☐ Other

Database resource pulled from:

Final status:

1. ☐ 1 - included
2. ☐ 2 - excluded
3. ☐ 3 - incomplete/unclear

If excluded, explain reasoning:

## PART 2: REGISTRY INFORMATION OR OTHER RESOURCE

Name of registry or other resource:

Primary goals/aims:

Funding source:

Years of operation:

Current status

1. ☐ Active
2. ☐ Inactive
3. ☐ On hold

Country(ies) where located:

Country representativeness:

1. ☐ Multi-national
2. ☐ National
3. ☐ State/Provincial
4. ☐ District
5. ☐ Sub-district
6. ☐ Community
7. ☐ Health clinic
8. ☐ Hospital
9. ☐ Other

Drug/vaccine exposure name and type:

Duration of follow up:

Current sample size:

1. ☐ <500 participants
2. ☐ 500 - 1,999 participants
3. ☐ 2,000 - 5,000 participants
4. ☐ 5,001 - 10,000 participants
5. ☐ 10,001 - 20,000 participants
6. ☐ >20,000 participants

Data collection:

1. ☐ Administrative databases
2. ☐ Medical databases
3. ☐ Registries
4. ☐ Research study
5. ☐ Program implementation
6. ☐ Other

Methodology:

Terminology and data system used:

## PART 3: CHARACTERISTICS OF INCLUDED POPULATION

Age ranges included:

Target population:

1. ☐ Pregnant women
2. ☐ Non-pregnant women / women of reproductive age
3. ☐ Children
4. ☐ Infants (<28 days old)
5. ☐ General population
6. ☐ Other

## Gestational age

1. ☐ First trimester
2. ☐ Second trimester
3. ☐ Third trimester

## Underlying medical condition(s):

## Maternal outcome(s) recorded:

1. ☐ Thrombosis and/or thrombocytopenia syndrome
2. ☐ Antenatal hospitalization (not including delivery)
3. ☐ Disability
4. ☐ Gestational diabetes
5. ☐ Gestational hypertension
6. ☐ Premature rupture of membranes
7. ☐ Preterm labor
8. ☐ Preeclampsia / Eclampsia
9. ☐ Post-partum hemorrhage
10. ☐ Antenatal hemorrhage
11. ☐ Corporeal infection
12. ☐ Spontaneous abortion / miscarriage / pregnancy loss (example: prior to 20 weeks gestation)
13. ☐ Maternal death (example: within 42 days of termination of pregnancy)
14. ☐ Late maternal death (example: >42 days of termination of pregnancy)
15. ☐ Other

## Maternal death cause:

1. ☐ Direct cause
2. ☐ Indirect cause

## Neonatal outcome(s) recorded:

1. ☐ Preterm birth
2. ☐ Small size for gestational age / restricted fetal growth
3. ☐ Still birth (death after 28 weeks of pregnancy but before birth)
4. ☐ Live birth
5. ☐ Congenital anomaly / birth defect
6. ☐ Death
7. ☐ Other

## Neonatal death timeframe

1. ☐ Early neonatal (0-7 days)
2. ☐ Late neonatal (8-28 days)
3. ☐ Post neonatal (29 days - 1 year)

Which congenital anomaly does this monitor (if any)?

Infant/child outcome(s) recorded:

1. ☐ Infections
2. ☐ Respiratory illness
3. ☐ Developmental outcomes
4. ☐ Other

What is the duration of follow up?

## PART 4: KEY FINDINGS

**Populate as best you can if information is provided; answer N/A if it is not relevant or N/P if it is not provided.**

Strengths of the registry or other resource:

Weaknesses / gaps of registry or other resource:

Challenges of registry or other resource in its specific context:

Does this resource have the possibility to add new interventions?

1. ☐ Yes
2. ☐ No
3. ☐ Maybe
4. ☐ Unknown

Why?

Can this resource be combined with other systems?

1. ☐ Yes
2. ☐ No
3. ☐ Maybe
4. ☐ Unknown

Why?

Any upcoming changes to the resource:

Additional comments
